# Supplementary material
Source: publisher site journal article supplement (https://www.dovepress.com/article/454961)
Supplement: Supplementary file 1 [file get_supplementary_file.php]

**Table S1.** Toxicity screening of flavonoids isolated from *Erythrina* plants

| No                | Compound Name                                                                                     | Toxicity  |                |             |
|-------------------|---------------------------------------------------------------------------------------------------|-----------|----------------|-------------|
|                   |                                                                                                   | Mutagenic | hERG Inhibitor | Hepatotoxic |
| <b>Flavones</b>   |                                                                                                   |           |                |             |
| 1                 | 6-Prenylapigenin                                                                                  | x         | ✓              | x           |
| 2                 | Luteolin                                                                                          | x         | x              | x           |
| 3                 | Vogelin C                                                                                         | x         | ✓              | x           |
| 4                 | Vogelin J                                                                                         | x         | ✓              | ✓           |
| 5                 | Carpachromene                                                                                     | x         | x              | x           |
| 6                 | Atalantoflavone (Limonianin)                                                                      | x         | ✓              | ✓           |
| 7                 | Neocyclomorusin                                                                                   | x         | ✓              | x           |
| 8                 | Salvigenin                                                                                        | x         | x              | x           |
| 9                 | Tetramethylisoscutearein                                                                          | ✓         | ✓              | x           |
| 10                | Sinensetin                                                                                        | x         | ✓              | x           |
| 11                | Vitexin                                                                                           | x         | ✓              | x           |
| 12                | Isovitexin                                                                                        | x         | x              | x           |
| 13                | Isovitexin-2"-β-D- glucopyranoside                                                                | x         | ✓              | x           |
| 14                | Apigenin-7-O-rhamnosyl-6-C-glucoside                                                              | x         | ✓              | x           |
| 15                | Vicenin-1                                                                                         | x         | ✓              | x           |
| 16                | Vicenin-2                                                                                         | x         | ✓              | x           |
| 17                | Isoorientin                                                                                       | x         | x              | x           |
| 18                | Diosmetin-6-C-glucoside                                                                           | x         | ✓              | x           |
| <b>Flavonols</b>  |                                                                                                   |           |                |             |
| 19                | 3,7,4'-Trihydroxyflavone                                                                          | x         | ✓              | x           |
| 20                | Kaempferol-3-O-(2"-O-β-D-glucopyranosyl-6"-O-α-L-rhamnopyranosyl-β-D-glucopyranoside)             | x         | ✓              | x           |
| 21                | Kaempferol-3-O-β-D-glucopyranosyl- (1 →2)-β-D-glucopyranoside                                     | x         | ✓              | x           |
| <b>Flavanones</b> |                                                                                                   |           |                |             |
| 22                | Liquiritigenin                                                                                    | ✓         | x              | x           |
| 23                | Isobavachin                                                                                       | ✓         | ✓              | x           |
| 24                | Glabrol                                                                                           | x         | ✓              | x           |
| 25                | Erythribyssin K                                                                                   | ✓         | x              | x           |
| 26                | Liquiritigenin-5'-O-methyl ether                                                                  | ✓         | x              | x           |
| 27                | 7,3',4'-Trihydroxyflavanone                                                                       | ✓         | x              | x           |
| 28                | 5'-(2-Hydroxy-3-methylbut-3-enyl) abyssinone II                                                   | x         | ✓              | x           |
| 29                | 7-Hydroxy-4'-methoxy-3'-(3- hydroxy-3-methyl-trans-but-1- enyl)-5'-(3-methylbut-2-enyl) flavanone | x         | x              | x           |
| 30                | Abyssinone I                                                                                      | x         | ✓              | x           |
| 31                | Abyssinone II                                                                                     | x         | ✓              | x           |
| 32                | Abyssinone III                                                                                    | x         | ✓              | x           |
| 33                | Abyssinone IV                                                                                     | x         | ✓              | x           |
| 34                | Abyssinone-IV-4'-O-methyl ether                                                                   | x         | ✓              | x           |
| 35                | Erylatissin C                                                                                     | x         | ✓              | x           |
| 36                | 5-Deoxyabyssinin II                                                                               | x         | ✓              | x           |
| 37                | 7-Hydroxy-4'-methoxy-3'-(3- methylbut-2-enyl)flavanone                                            | x         | ✓              | x           |
| 38                | 2(S)-5',7-Dihydroxy-[2'',2''-(3''- hydroxy)-dimethylpyrano]- (5'',6'':3',4')flavanone             | x         | x              | x           |

|    |                                                                                                                          |   |   |   |
|----|--------------------------------------------------------------------------------------------------------------------------|---|---|---|
| 39 | 2(S)-5',7-Dihydroxy-[2'',2''-(3''- hydroxy)-dimethylpyrano]- (5'',6''':3',4')flavanone                                   | ✓ | x | x |
| 40 | Erythribyssin G                                                                                                          | x | ✓ | x |
| 41 | Erythribyssin I                                                                                                          | ✓ | ✓ | x |
| 42 | Erylivingstone I                                                                                                         | ✓ | x | x |
| 43 | Naringenin                                                                                                               | ✓ | x | x |
| 44 | Isosakuranetin                                                                                                           | ✓ | ✓ | x |
| 45 | Eriodictyol ( -5.061, mode 41)                                                                                           | x | x | x |
| 46 | Homohesperetin                                                                                                           | ✓ | x | x |
| 47 | 3'-Prenylnaringenin                                                                                                      | x | ✓ | x |
| 48 | Licoflavanone-4'-O-methyl ether                                                                                          | x | ✓ | x |
| 49 | Abyssinone V                                                                                                             | x | ✓ | x |
| 50 | Abyssinone-V-4'-O-methyl ether                                                                                           | x | ✓ | x |
| 51 | 6-Prenylabyssinone V                                                                                                     | x | ✓ | x |
| 52 | Ispedezaflavanone B (Euchrestaflavanone A)                                                                               | x | ✓ | x |
| 53 | 5-Hydroxysophoranone                                                                                                     | x | ✓ | x |
| 54 | Burttinonedehydrate                                                                                                      | x | ✓ | x |
| 55 | Burttinone                                                                                                               | x | ✓ | x |
| 56 | Erycaffra D ( -5.423, mode 33)                                                                                           | x | x | x |
| 57 | Erycaffra F ( -5.998, mode 12)                                                                                           | x | x | x |
| 58 | Sigmoidin A                                                                                                              | x | ✓ | x |
| 59 | Sigmoidin B                                                                                                              | x | ✓ | x |
| 60 | 3'-O-Methylsigmoidin                                                                                                     | x | x | x |
| 61 | 4'-O-Methylsigmoidin                                                                                                     | x | x | x |
| 62 | Sigmoidin C                                                                                                              | x | x | x |
| 63 | Sigmoidin D                                                                                                              | x | x | x |
| 64 | Sigmoidin E                                                                                                              | x | x | x |
| 65 | Sigmoidin F                                                                                                              | x | x | x |
| 66 | Sigmoidin G                                                                                                              | x | x | x |
| 67 | 2(S)-5,5',7-Trihydroxy-2'-prenyl- (2'',2''-dimethylpyrano)- (5'',6''':3',4')flavanone                                    | x | ✓ | x |
| 68 | 2(S)-5,5',7-Trihydroxy- [2''(5''- hydroxy)-methylpyrano]- (5'',6''':3',4')flavanone                                      | x | ✓ | x |
| 69 | 2 (S)-5,7-Dihydroxy-3'-methoxy- [2''(5''-hydroxy)-methylpyrano]- (5'',6''':3',4')flavanone                               | x | x | x |
| 70 | 2(S)-5,7-Dihydroxy-[(5'',6''':3',4')- (2'',2''-dimethylpyrano)- (5''',6''':5',6')]- (2''',2'''- dimethylpyrano)flavanone | x | ✓ | x |
| 71 | Erysenegalone (Erythrisenegalone)                                                                                        | x | ✓ | x |
| 72 | Citflavanone                                                                                                             | x | ✓ | x |
| 73 | Lonchocarpol A (Senegalensein)                                                                                           | x | ✓ | x |
| 74 | Lonchocarpol C                                                                                                           | x | ✓ | x |
| 75 | Lonchocarpol D                                                                                                           | x | ✓ | x |
| 76 | Lupinifolin                                                                                                              | x | ✓ | x |
| 77 | Fuscaflavanones A1                                                                                                       | x | ✓ | x |
| 78 | Fuscaflavanones A2                                                                                                       | x | ✓ | x |
| 79 | Fuscaflavanones B                                                                                                        | x | ✓ | x |
| 80 | Abyssinin I                                                                                                              | x | ✓ | x |
| 81 | Abyssinoflavanone II (Abyssinin II)                                                                                      | x | x | x |
| 82 | Abyssinin III                                                                                                            | x | ✓ | x |
| 83 | Abyssinoflavanone IV                                                                                                     | x | ✓ | x |
| 84 | Abyssinoflavanone V                                                                                                      | x | ✓ | x |

|     |                                                                                                                |   |   |   |
|-----|----------------------------------------------------------------------------------------------------------------|---|---|---|
| 85  | Abyssinoflavanone VI                                                                                           | x | ✓ | x |
| 86  | Abyssinoflavanone VII                                                                                          | x | ✓ | x |
| 87  | 2(S)-5'-(2-Hydroxy-3-methylbut-3-enyl)licoflavone-4'-O-methyl ether                                            | x | ✓ | x |
| 88  | 2(S)-5,7-Dihydroxy-5'-prenyl- [2'',2''-(3''-hydroxy)-dimethylpyrano]-(5'',6'':3',4') flavanone                 | x | ✓ | x |
| 89  | 2(S)-5,7-Dihydroxy-5'-methoxy- [2'',2''-(3''-hydroxy)-dimethylpyrano]-(5'',6'':3',4') flavanone                | x | x | x |
| 90  | 2(S)-5,7-Dihydroxy- [2'',2''-(3'',4''-dihydroxy)-dimethylpyrano]-(5'',6'':3',4') flavanone                     | x | x | x |
| 91  | 2(S)-5,7-Dihydroxy-5'-prenyl [2'',2''-(3'',4''-dihydroxy)-dimethylpyrano]-(5'',6'':3',4') flavanone            | x | ✓ | x |
| 92  | 2(S)-5,5',7-Dihydroxy-6'-prenyl [2'',2''-(3'',4''-dihydroxy)-dimethylpyrano]-(5'',6'':3',4') flavanone         | x | x | x |
| 93  | 2(S)-5,5',7-Trihydroxy-[2'',2''-(4''- chromanone)-dimethylpyrano]-(5'',6'':3',4') flavanone                    | x | x | x |
| 94  | (2S)-5,7-Dihydroxy-5'-prenyl-2''-(4''-hydroxyisopropyl)-dihydrofuran[1'',3'':3',4'] flavanone                  | x | ✓ | x |
| 95  | (2S)-5,7-Dihydroxy-5'-methoxy-2''- (4''-hydroxyisopropyl)- dihydrofuran[1'',3'':3',4'] flavanone               | x | ✓ | x |
| 96  | (2S)-5,7,5'-Trihydroxy-2''-(4''- hydroxyisopropyl)-dihydrofuran [1'',3'':3',4']flavanone                       | x | ✓ | x |
| 97  | (2S)-5,7-Dihydroxy-5'-prenyl-2''- (4''-hydroxyisopropyl)-3''-hydroxy-dihydrofuran [1'',3'':3',4']flavanone     | x | ✓ | x |
| 98  | (2S)-5,7,5'-Trihydroxy-2''-(4''- hydroxyisopropyl)-3''-hydroxy-dihydrofuran[1'',3'':3',4'] flavanone           | ✓ | x | x |
| 99  | (2S)-5,7,5'-Trihydroxy-6'-prenyl-2''-(4''-hydroxyisopropyl)-3''- hydroxy-dihydrofuran[1'',3'':4',5'] flavanone | x | x | x |
| 100 | Addisoniaflavanone I                                                                                           | x | x | x |
| 101 | Addisoniaflavanone II                                                                                          | x | x | x |
| 102 | Addisoniaflavanone III                                                                                         | x | ✓ | x |
| 103 | 5,7-Dihydroxy-3',4'-dimethoxy-5'- (3-methylbut-2-enyl)flavanone                                                | x | x | x |
| 104 | Erylivingstone A                                                                                               | x | x | x |
| 105 | Erylivingstone B                                                                                               | x | x | x |
| 106 | Erylivingstone C                                                                                               | x | x | x |
| 107 | Erylivingstone D                                                                                               | x | x | x |
| 108 | Erylivingstone E                                                                                               | x | ✓ | x |
| 109 | Erylivingstone F                                                                                               | x | ✓ | x |
| 110 | Erylivingstone G                                                                                               | x | x | x |
| 111 | Erylivingstone H                                                                                               | x | x | x |
| 112 | Hamiltone A                                                                                                    | x | x | x |
| 113 | 6-Methoxyhamiltone A                                                                                           | ✓ | x | x |

#### Chalcones

|     |                                |   |   |   |
|-----|--------------------------------|---|---|---|
| 114 | Isobavachalcone                | x | x | x |
| 115 | Isoliquiritigenin              | x | ✓ | x |
| 116 | Licoagrochalcone A             | ✓ | x | x |
| 117 | Abyssinone VI                  | x | ✓ | x |
| 118 | Abyssinone-VI-4-O-methyl ether | x | ✓ | x |
| 119 | Butein                         | x | ✓ | x |
| 120 | 3-O-Methylbutein               | x | x | x |
| 121 | 5-Prenylbutein                 | x | ✓ | x |
| 122 | Abyssinone A                   | x | ✓ | x |

|                       |                                                                                            |   |   |   |
|-----------------------|--------------------------------------------------------------------------------------------|---|---|---|
| 123                   | Abyssinone B                                                                               | x | ✓ | x |
| 124                   | Abyssinone C                                                                               | x | ✓ | x |
| 125                   | Abyssinone D                                                                               | x | ✓ | x |
| 126                   | 2,4,4'-Trihydroxychalcone                                                                  | x | ✓ | x |
| 127                   | 6'-Hydroxy-2',3',4',4'- tetramethoxychalcone                                               | x | x | x |
| <b>Isoflavans</b>     |                                                                                            |   |   |   |
| 128                   | Eryzerin C                                                                                 | x | ✓ | x |
| 129                   | 4',7-Dihydroxy-2'-methoxy-3'-(3- methylbut-2-enyl)isoflavan                                | x | ✓ | x |
| 130                   | Eryzerin D                                                                                 | x | ✓ | x |
| 131                   | Eryzerin C                                                                                 | x | ✓ | x |
| 132                   | Eryvarin T                                                                                 | ✓ | ✓ | x |
| 133                   | Erythribidin A                                                                             | ✓ | x | x |
| 134                   | Phaseollinisoflavan                                                                        | x | x | x |
| 135                   | 2'-Methoxyphaseollinisoflavan                                                              | x | x | x |
| 136                   | Erylivingstone J                                                                           | x | x | x |
| 137                   | Erylivingstone K                                                                           | x | x | x |
| 138                   | 2',7-Dihydroxy-3' -(3-methylbut-2- enyl)-2''',2'''-dimethylpyrano [5'',6'':4',5']isoflavan | x | x | ✓ |
| <b>Isoflav-3-enes</b> |                                                                                            |   |   |   |
| 139                   | Erypoegin A (Burttinol C)                                                                  | x | x | x |
| 140                   | Erypoegin B (Burttinol B)                                                                  | ✓ | ✓ | x |
| 141                   | Burttinol A                                                                                | ✓ | ✓ | x |
| 142                   | 7,4'-Dihydroxy-2',5'- dimethoxyisoflav-3-ene                                               | x | ✓ | x |
| 143                   | Bidwillol A                                                                                | ✓ | x | x |
| 144                   | Eryvarin H                                                                                 | x | ✓ | x |
| 145                   | Eryvarin I                                                                                 | ✓ | x | x |
| 146                   | Eryvarin O                                                                                 | x | x | x |
| <b>Isoflavanones</b>  |                                                                                            |   |   |   |
| 147                   | Vestitone                                                                                  | x | x | ✓ |
| 148                   | Eriotrichin B (Bidwillon A)                                                                | x | x | x |
| 149                   | Prostratol C                                                                               | x | ✓ | x |
| 150                   | Erythribyssin E                                                                            | x | x | x |
| 151                   | Erythribyssin J                                                                            | x | x | x |
| 152                   | Orientanol D                                                                               | x | x | x |
| 153                   | Orientanol F                                                                               | x | ✓ | x |
| 154                   | 5,2',4'-Trihydroxy-6-prenyl-2''',2'''dimethyldihydropyrano[5''',6'''] isoflavanone         | x | ✓ | x |
| 155                   | 5-Deoxyglasperin F                                                                         | x | ✓ | x |
| 156                   | 5-Deoxylicoisoflavanones                                                                   | x | ✓ | x |
| 157                   | Sigmoidin H                                                                                | x | x | x |
| 158                   | Sigmoidin I                                                                                | x | x | x |
| 159                   | Sigmoidin J                                                                                | x | x | x |
| 160                   | Bidwillon B                                                                                | x | x | x |
| 161                   | 2,3-Dihydro-2'-hydroxyneobavaisoflavanone                                                  | x | ✓ | x |
| 162                   | Eryvellutinone                                                                             | x | ✓ | x |
| 163                   | Eryzerin A                                                                                 | x | ✓ | x |
| 164                   | Eryvarin B                                                                                 | x | ✓ | x |
| 165                   | Eryvarin M                                                                                 | x | x | x |
| 166                   | Eryvarin N                                                                                 | ✓ | x | x |
| 167                   | Eryvarin V                                                                                 | ✓ | x | x |

|                    |                                                                                                |   |   |   |
|--------------------|------------------------------------------------------------------------------------------------|---|---|---|
| 168                | Eryzerin B                                                                                     | x | ✓ | x |
| 169                | Erycaffra E                                                                                    | x | ✓ | x |
| 170                | 5,7-Dihydroxy-2',4',5'-trimethoxyisoflavanone                                                  | x | x | x |
| 171                | Orientalol E                                                                                   | x | x | x |
| 172                | 2,3-Dihydro-2'-hydroxyosajin                                                                   | x | ✓ | x |
| 173                | Erythraddison III                                                                              | x | x | x |
| 174                | Erythraddison IV                                                                               | x | ✓ | x |
| 175                | 2,3-Dihydropratensein                                                                          | ✓ | ✓ | x |
| 176                | 5,7,3'-Trihydroxy-4'-methoxy-6,5'di(γ,γ-dimethylallyl)isoflavanone                             | x | ✓ | x |
| 177                | (R)-saclenone                                                                                  | x | ✓ | x |
| 178                | 5,3'-Dihydroxy-4'-methoxy-5'-γ,γ-dimethylallyl-2'',2''-dimethylpyrano[5,6:6,7] isoflavanone    | x | x | x |
| 179                | 5,3'-Dihydroxy-2'',2''-dimethylpyrano-[5,6:6,7]-2''',2'''-dimethylpyrano[5,6:5,4] isoflavanone | x | ✓ | x |
| 180                | 2,3-Dihydroauriculatin                                                                         | x | x | x |
| 181                | 5,4-Dihydroxy-2-methoxy-8-(3,3-dimethylallyl)-2,2-dimethylpyrano [5,6:6,7]isoflavanone         | x | ✓ | x |
| 182                | Glyasperin F                                                                                   | x | ✓ | x |
| 183                | Licoisoflavanones                                                                              | ✓ | ✓ | x |
| 184                | Vogelin A (Lysisteisoflavanone)                                                                | ✓ | x | x |
| 185                | Erypogin C (Vogelin B)                                                                         | x | x | x |
| 186                | Erypogin D                                                                                     | x | ✓ | x |
| 187                | Erypogin G                                                                                     | x | ✓ | x |
| 188                | Vogelin D                                                                                      | x | ✓ | x |
| 189                | Auriculatin 4'-O-glucoside                                                                     | x | ✓ | x |
| <b>Isoflavones</b> |                                                                                                |   |   |   |
| 190                | Daidzein                                                                                       | x | x | x |
| 191                | 8-Prenyldaidzein                                                                               | ✓ | ✓ | x |
| 192                | Neobavaisoflavone                                                                              | ✓ | ✓ | ✓ |
| 193                | Erysubin F                                                                                     | ✓ | ✓ | ✓ |
| 194                | Eryvarin S                                                                                     | ✓ | ✓ | ✓ |
| 195                | Erythraddison II                                                                               | ✓ | ✓ | ✓ |
| 196                | 2',7-Dihydroxy-4'-methoxy-5'-(3-methylbut-2-enyl)isoflavone                                    | x | ✓ | ✓ |
| 197                | Calycosin                                                                                      | x | ✓ | x |
| 198                | 5-Deoxy-3'-prenylbiochanin A                                                                   | x | ✓ | x |
| 199                | Erylatissin A                                                                                  | ✓ | ✓ | x |
| 200                | Erylatissin B                                                                                  | x | ✓ | x |
| 201                | Corylin                                                                                        | x | x | x |
| 202                | Bidwillon C                                                                                    | x | x | ✓ |
| 203                | Erythrinin A                                                                                   | x | ✓ | x |
| 204                | Genistein                                                                                      | x | ✓ | ✓ |
| 205                | 6-Hydroxygenistein                                                                             | ✓ | ✓ | x |
| 206                | 6,8-Diprenylgenistein                                                                          | ✓ | ✓ | x |
| 207                | Wighteone (Erythrinin B) (6-Prenylgenistein)                                                   | x | ✓ | x |
| 208                | Lupiwighteone (8-Prenylgenistein)                                                              | x | ✓ | x |
| 209                | Isowighteone (3'-Isoprenylgenistein)                                                           | ✓ | ✓ | x |
| 210                | Isolupabigenin                                                                                 | x | ✓ | x |
| 211                | 6,8-Diprenylorobol                                                                             | x | ✓ | ✓ |
| 212                | 3'-O-Methylorobol                                                                              | x | ✓ | x |

|     |                                                                           |   |   |   |
|-----|---------------------------------------------------------------------------|---|---|---|
| 213 | 5,4'-Dihydroxy-7-methoxy-3'-(3- methylbuten-2-yl)isoflavone               | x | ✓ | x |
| 214 | 5,2',4'-Trihydroxy-7-methoxy-5'-(3- methylbuten-2-yl)isoflavone           | x | ✓ | ✓ |
| 215 | Cajanin                                                                   | x | ✓ | x |
| 216 | 3'-Formyl-5,4'-dihydroxy-7- methoxyisoflavone                             | x | ✓ | x |
| 217 | 5,4'-Dihydroxy-7-methoxy-3'-(3- methyl-2-hydroxybuten-3-yl) isoflavone    | x | ✓ | x |
| 218 | 5-Hydroxy-3"-hydroxy-2",2"- dimethyldihydropyrano [5",6":3',4']isoflavone | x | ✓ | x |
| 219 | 4'-Hydroxy-5,7- dimethoxyisoflavone                                       | x | ✓ | x |
| 220 | Vogelin E                                                                 | x | ✓ | x |
| 221 | Vogelin F                                                                 | x | ✓ | x |
| 222 | Vogelin G                                                                 | x | ✓ | x |
| 223 | Ficuisoflavone                                                            | x | ✓ | x |
| 224 | 5'-Prenylpratensein                                                       | ✓ | ✓ | ✓ |
| 225 | 3'-(3-Methylbut-2-enyl) biochanin                                         | x | ✓ | x |
| 226 | Piscerythrinetin                                                          | x | ✓ | x |
| 227 | 2'-Hydroxy-5'-methoxybiochanin A                                          | x | ✓ | x |
| 228 | 5'-Formylpratensein                                                       | x | ✓ | x |
| 229 | 5,7-Dihydroxy-4'-methoxy-3'-(2,3- dihydroxy-3-methylbutyl) isoflavone     | x | ✓ | x |
| 230 | Schliebenone A                                                            | x | ✓ | x |
| 231 | Schliebenone B                                                            | x | ✓ | x |
| 232 | Schliebenone C                                                            | x | ✓ | x |
| 233 | 5,4'-Dimethoxy-3'-prenylbiochanin A                                       | x | ✓ | x |
| 234 | Laburnetin                                                                | x | ✓ | x |
| 235 | Indicanine D                                                              | x | ✓ | x |
| 236 | Alpinumisoflavone                                                         | x | ✓ | ✓ |
| 237 | 4-O-Methylalpinumisoflavone                                               | x | ✓ | ✓ |
| 238 | 5,4'-Dimethoxy alpinumisoflavone                                          | x | ✓ | ✓ |
| 239 | Indicanine C                                                              | x | ✓ | x |
| 240 | Indicanine E                                                              | x | ✓ | x |
| 241 | Parvisoflavone B                                                          | x | ✓ | x |
| 242 | Warangalone (Scandenone)                                                  | x | ✓ | x |
| 243 | Auriculasin                                                               | ✓ | ✓ | x |
| 244 | Auriculatin                                                               |   | ✓ | x |
| 245 | Warangalone 4'-O-methyl ether                                             | ✓ | ✓ | x |
| 246 | Robustone                                                                 | ✓ | ✓ | x |
| 247 | M-Wi-2                                                                    | x | ✓ | x |
| 248 | Erythgianin A                                                             | x | ✓ | x |
| 249 | 4',7'-Dihydroxy-2",2"- dimethylpyrano[5",6":5,6] isoflavone               | x | ✓ | x |
| 250 | Osajin                                                                    | x | ✓ | ✓ |
| 251 | Derrone                                                                   | x | ✓ | ✓ |
| 252 | Isoderrone                                                                | x | ✓ | ✓ |
| 253 | Isochandalon                                                              | x | ✓ |   |
| 254 | Erysubin A                                                                | x | ✓ | ✓ |
| 255 | Erysubin B                                                                | x | ✓ | ✓ |

|                    |                                                                                            |   |   |   |
|--------------------|--------------------------------------------------------------------------------------------|---|---|---|
| 256                | 5,4'-Dihydroxy-2'-methoxy-8-(3,3- dimethylallyl)-2'',2''-dimethylpyrano[5,6:6,7]isoflavone | x | ✓ | x |
| 257                | 5,7,4'-Trihydroxy-6-(3'',3''-dimethylallyloxiranylmethyl) isoflavone                       | x | ✓ | ✓ |
| 258                | Erymildbraedin A                                                                           | x | ✓ | x |
| 259                | 5,4-Dihydroxy-8-(3,3- dimethylallyl)-2-methoxyisopropylfurano[4,5:6,7] isoflavone          | ✓ | ✓ | x |
| 260                | Erymildbraedin B                                                                           | x | ✓ | ✓ |
| 261                | Erysenegalensein D                                                                         | x | ✓ | x |
| 262                | Erysenegalensein E                                                                         | ✓ | ✓ | ✓ |
| 263                | Isoerysenegalensein E (Lysisteisoflavone)                                                  | x | ✓ | ✓ |
| 264                | Erysenegalensein F                                                                         | x | ✓ |   |
| 265                | Erysenegalensein G                                                                         | x | ✓ | ✓ |
| 266                | Erysenegalensein K                                                                         | ✓ | ✓ | x |
| 267                | Erysenegalensein L                                                                         | x | ✓ | x |
| 268                | Erysenegalensein M                                                                         | x | ✓ | x |
| 269                | Erysenegalensein N                                                                         | x | ✓ | x |
| 270                | Erysenegalensein O                                                                         | x | ✓ | x |
| 271                | 5,7,4'-Trihydroxy-6-(2''-hydroxy3''-methylbut-3''enyl) isoflavone                          | x | ✓ | x |
| 272                | Erypoegin K                                                                                | x | ✓ | ✓ |
| 273                | Senegalensin                                                                               | x | ✓ | ✓ |
| 274                | Erythrinin C                                                                               | x | ✓ | x |
| 275                | Hydroxyerythrinin C                                                                        | x | ✓ | x |
| 276                | 8-Prenylerythrinin C (Isosenegalensein) (Euchrenone b10)                                   | x | ✓ | ✓ |
| 277                | Vogelin H                                                                                  | ✓ | ✓ | ✓ |
| 278                | Vogelin I                                                                                  | x | ✓ | ✓ |
| 279                | Eriotriochin                                                                               | x | ✓ | ✓ |
| 280                | Erythraddison I                                                                            | x | ✓ | x |
| 281                | Panchovillin                                                                               | x | ✓ | x |
| 282                | 7-Demethylrobustigenin                                                                     | x | ✓ | x |
| 283                | 7-O-Methyluteone                                                                           | x | ✓ | x |
| 284                | 2,3-Dehydrokievitone                                                                       | ✓ | ✓ | x |
| 285                | 8-Prenylluteone                                                                            | x | ✓ | x |
| 286                | 4'-Hydroxyisoflavone-7-O-β-D-glucopyranoside                                               | x | ✓ | x |
| 287                | 4'-Hydroxyisoflavone-7-O-α-L-rhamnosyl/ (1 →6)-β-D-glucopyranoside                         | x | x | x |
| 288                | Derriscanoside B                                                                           | x | x | x |
| <b>Pterocarpan</b> |                                                                                            |   |   |   |
| 289                | Demethylmedicarpin                                                                         | ✓ | x | x |
| 290                | Sophorapterocarpan A (Homoedudiol)                                                         | ✓ | ✓ | x |
| 291                | Phaseollidin                                                                               | ✓ | ✓ | x |
| 292                | 1-Methoxy phaseollidin                                                                     | x | ✓ | x |
| 293                | Erythrabyssin II                                                                           | x | ✓ | x |
| 294                | 1-Methoxyerythrabyssin II                                                                  | x | ✓ | x |
| 295                | Calopocarpin                                                                               | ✓ | ✓ | x |
| 296                | 3,9-Dihydroxy-4-prenylpterocarpan                                                          | ✓ | ✓ | x |
| 297                | Eryvarin J                                                                                 | x | ✓ | x |
| 298                | Eryvarin K                                                                                 | x | ✓ | x |

|                                                |                                                                      |   |   |   |
|------------------------------------------------|----------------------------------------------------------------------|---|---|---|
| 299                                            | Erythribyssin B                                                      | ✓ | x | x |
| 300                                            | Erythribyssin C                                                      | x | x | x |
| 301                                            | Medicarpin                                                           | ✓ | x | x |
| 302                                            | Sandwicensin                                                         | ✓ | x | x |
| 303                                            | Erycristin                                                           | x | ✓ | x |
| 304                                            | 3-Hydroxy-10-(3-hydroxy-3- methylbutyl)-9-<br>methoxypterocarpan     | x | x | x |
| 305                                            | 3-Hydroxy-10-(2,3-dihydroxy-3- methylbutyl)-9-<br>methoxypterocarpan | x | ✓ | x |
| 306                                            | Dolichins A                                                          | x | ✓ | x |
| 307                                            | Erybraedin A                                                         | x | ✓ | x |
| 308                                            | Erybraedin B                                                         | x | ✓ | x |
| 309                                            | Erybraedin C                                                         | x | ✓ | x |
| 310                                            | Erybraedin D                                                         | x | x | x |
| 311                                            | Erybraedin E                                                         | ✓ | x | x |
| 312                                            | Erybraedin F                                                         | x | x | x |
| 313                                            | Erystagallin C                                                       | ✓ | ✓ | x |
| 314                                            | Erylysin A                                                           | x | ✓ | x |
| 315                                            | Erylysin B                                                           | x | ✓ | x |
| 316                                            | Erylysin C                                                           | x | x | x |
| 317                                            | Shinpterocarpan                                                      | x | x | x |
| 318                                            | Orientalol B                                                         | x | ✓ | x |
| 319                                            | Orientalol C                                                         | x | x | x |
| 320                                            | Neorautenol                                                          | ✓ | x | x |
| 321                                            | Isoneorautenol                                                       | ✓ | x | x |
| 322                                            | 8-Methoxyneorautenol                                                 | ✓ | x | x |
| 323                                            | Phaseollin                                                           | x | ✓ | x |
| 324                                            | Folitenol                                                            | x | ✓ | x |
| 325                                            | Erythribyssin L                                                      | ✓ | ✓ | x |
| 326                                            | Erythribyssin D                                                      | ✓ | ✓ | x |
| 327                                            | Erythribyssin M                                                      | ✓ | ✓ | x |
| 328                                            | Erysubin C                                                           | ✓ | x | x |
| 329                                            | Erysubin D                                                           |   | ✓ | x |
| 330                                            | Fuscacarpan A                                                        | ✓ | ✓ | x |
| <b>6<math>\alpha</math>-Hydroxypterocarpan</b> |                                                                      |   |   |   |
| 331                                            | Cristacarpan (Erythrabissin I)                                       | ✓ | x | x |
| 332                                            | Erystagallin A                                                       | x | ✓ | x |
| 333                                            | Demethylerystagallin A                                               | x | ✓ | x |
| 334                                            | Erystagallin B                                                       | x | ✓ | x |
| 335                                            | Eryzerin E                                                           | x | ✓ | x |
| 336                                            | Fuscacarpan B                                                        | ✓ | x | x |
| 337                                            | Fuscacarpan C                                                        | ✓ | x | x |
| 338                                            | Erypoegin I                                                          | x | ✓ | x |
| 339                                            | Erypoegin J                                                          | x | x | x |
| 340                                            | Orientalol A                                                         | x | ✓ | x |
| 341                                            | Erysubin E                                                           | ✓ | ✓ | x |
| 342                                            | Eryvarin A                                                           | ✓ | x | x |
| 343                                            | Erythribyssin A                                                      | x | ✓ | x |
| 344                                            | Hydroxycristacarpone                                                 | x | x | x |



| <b>Pterocarpenes</b>                 |                                                                |   |   |   |
|--------------------------------------|----------------------------------------------------------------|---|---|---|
| 345                                  | Erycristagallin                                                | ✓ | ✓ | x |
| 346                                  | Erypoegin E                                                    | ✓ | ✓ | x |
| 347                                  | Erypoegin H                                                    | ✓ | ✓ | x |
| 348                                  | Eryvarin D                                                     | x | ✓ | x |
| 349                                  | Eryvarin E                                                     | x | ✓ | x |
| 350                                  | Eryvarin W                                                     | ✓ | ✓ | x |
| 351                                  | Erythribyssin O                                                | ✓ | ✓ | x |
| <b>Coumestans</b>                    |                                                                |   |   |   |
| 352                                  | Coumasterol                                                    | ✓ | ✓ | x |
| 353                                  | 4-Hydroxycoumasterol                                           | x | ✓ | x |
| 354                                  | Sigmoidin K                                                    | ✓ | ✓ | ✓ |
| 355                                  | Isosojagol                                                     | ✓ | ✓ | x |
| 356                                  | Erythribyssin N                                                | x | ✓ | x |
| <b>3-Arylcoumarins</b>               |                                                                |   |   |   |
| 357                                  | Indicanine A                                                   | x | ✓ | x |
| 358                                  | Indicanine B                                                   | x | ✓ | x |
| 359                                  | Robustic acid                                                  | x | ✓ | x |
| <b>Coumaronochromones</b>            |                                                                |   |   |   |
| 360                                  | Erysenegalensein J                                             | x | x | x |
| <b>2-Arylbenzofurans</b>             |                                                                |   |   |   |
| 361                                  | Latissimbenzofuran                                             | ✓ | ✓ | x |
| 362                                  | 2-(5'-Hydroxy-3"-methoxyphenyl)- 6-hydroxy-5-methoxybenzofuran | x | ✓ | x |
| 363                                  | Vignafuran                                                     | ✓ | ✓ | x |
| 364                                  | Eryvarin L                                                     | ✓ |   | x |
| 365                                  | Eryvarin P                                                     | x | ✓ | x |
| 366                                  | Eryvarin Q                                                     | x | ✓ | x |
| 367                                  | Eryvarin U                                                     | x | x | x |
| 368                                  | Glyinflanin H                                                  | x | ✓ | x |
| 369                                  | Burttinol D                                                    | ✓ | ✓ | x |
| 370                                  | Erypoegin F                                                    | x | ✓ | x |
| 371                                  | Erythribyssin F                                                | x | x | x |
| 372                                  | 2'-O-Demethylbidwillol B                                       | x | ✓ | x |
| 373                                  | Addisofuran A                                                  | ✓ | ✓ | x |
| 374                                  | Addisofuran B                                                  | ✓ | ✓ | x |
| 375                                  | Kanzonol U (Glabrocoumarone A)                                 | x | ✓ | x |
| <b>3-Aryl-2,3-dihydrobenzofurans</b> |                                                                |   |   |   |
| 376                                  | Erythribyssin H                                                | ✓ | x | x |
| 377                                  | Eryvarin R                                                     | ✓ | x | x |
| <b>Biflavonoids</b>                  |                                                                |   |   |   |
| 378                                  | Bis-Sigmodiol                                                  | x | ✓ | x |
| <b>Flavone</b>                       |                                                                |   |   |   |
| 379                                  | Abyssinoside A                                                 | ✓ | ✓ | x |
| 380                                  | Abyssinoside B                                                 | ✓ | ✓ | x |
| 381                                  | Abyssinoside C                                                 | x | ✓ | x |
| 382                                  | Abyssinoside D                                                 | x | ✓ | x |
| 383                                  | Apigenin                                                       | ✓ | ✓ | x |
| 384                                  | Isochafftoside                                                 | ✓ | ✓ | x |

|                   |                                                                                                                                 |   |   |   |
|-------------------|---------------------------------------------------------------------------------------------------------------------------------|---|---|---|
| 385               | 5,7,4'-Trihydroxy-3'-methoxy-8-C-prenylflavone 7-O- $\beta$ -D-glucopranosyl-(1 $\rightarrow$ 3)- $\alpha$ -L-arabinopyranoside | x | ✓ | x |
| 386               | Schaftoside                                                                                                                     | ✓ | ✓ | x |
| 387               | Vogeol                                                                                                                          | x | ✓ | x |
| <b>Flavanone</b>  |                                                                                                                                 |   |   |   |
| 388               | Abyssinone VII                                                                                                                  | x | ✓ | x |
| 389               | (2S)-5,7-Dihydroxy-3'-methoxy-2" $\xi$ -(4"-hydroxyisopropyl)dihydrofurano[1",3":4',5']flavanone                                | ✓ | x | x |
| 390               | 2(s)-5,7-Dihydroxy-3'-methoxy-[(5",6":3,4)-2",2"-dimethylpyrano- (5",6":5',6')]- (2"', 2"'-dimethylpyrano)flavanone             | x | ✓ | x |
| 391               | 2S)-5,7-Dihydroxy-3'-prenyl-2" $\xi$ -(4"-hydroxyisopropyl)dihydrofurano[1",3":4',5'] flavanone                                 | ✓ | ✓ | x |
| 392               | (2S)-5,7-Dihydroxy-3'-prenyl-2" $\xi$ -(4"-hydroxy-isopropyl)-3"-hydroxydihydrofurano[1",3":4',5'] flavanone                    | ✓ | x | x |
| 393               | Eriotrinol                                                                                                                      | x | x | x |
| 394               | Erylatissin D                                                                                                                   | ✓ | x | x |
| 395               | Erylatissin E                                                                                                                   | ✓ | x | x |
| 396               | Erylatissin G                                                                                                                   | x | x | x |
| 397               | 7-Hydroxy-2-[4-methoxy-3-(3-methylbut-2-enyl)phenyl]chroman-4-one                                                               | x | ✓ | x |
| 398               | 2S-3'-(2-Hydroxy-3-methylbut-3-enyl)abyssinone II                                                                               | x | ✓ | x |
| 399               | 2S-3'-(2-Hydroxy-3-methylbut-3-enyl)licoflavone-4'-methyl ether                                                                 | x | ✓ | x |
| 400               | Dihydroxyabyssin                                                                                                                | x | x | x |
| 401               | 4'-Hydroxy-6,3',5'-triprenylisoflavonone                                                                                        | ✓ | ✓ | ✓ |
| 402               | Mildbone                                                                                                                        | ✓ | ✓ | ✓ |
| 403               | 8-(3"-Methylbut-2"-enyl)-7, 3', 4'-trihydroxyflavanone                                                                          | ✓ | ✓ | ✓ |
| 404               | 4'-Methoxylicoflavonone                                                                                                         | ✓ | ✓ | ✓ |
| 405               | Obovatin                                                                                                                        | x | x | x |
| 406               | Sigmoidin B 4'-methyl ether                                                                                                     | ✓ | ✓ | ✓ |
| 407               | Sigmoidin L                                                                                                                     | x | x | x |
| 408               | Bis-sigmoidiol                                                                                                                  | ✓ | ✓ | ✓ |
| 409               | Sigmone                                                                                                                         | ✓ | ✓ | ✓ |
| 410               | Simotriol                                                                                                                       | ✓ | x | x |
| 411               | 5,7,4'-Trihydroxy-3'-methoxyflavanone                                                                                           | ✓ | x | x |
| 412               | (2S)-5,7,3'-Trihydroxy-2'-prenyl-2" $\xi$ -(4"-hydroxyisopropyl)-3"-hydroxy-dihydrofurano [1",3":4',5'] flavanone               | ✓ | ✓ | x |
| 413               | (2S)-5,7,3'-Trihydroxy-2" $\xi$ -(4"-hydroxyisopropyl)dihydrofurano [1",3":4',5']flavanone                                      | ✓ | x | x |
| 414               | (2S)-5,7,3'-Trihydroxy-2" $\xi$ -(4"-hydroxyisopropyl)-3"-hydroxydihydrofurano[1",3":4',5'] flavanone                           | ✓ | x | x |
| 415               | 2(S)-5,6',7-Trihydroxy-5'-prenyl-[2",2"-(3", 4"-dihydroxy)-dimethylpyrano]- (5",6":3',4')flavanone                              | ✓ | x | x |
| <b>Chalcone</b>   |                                                                                                                                 |   |   |   |
| 416               | Mildbone                                                                                                                        | x | x | x |
| 417               | Trans-3,4,2',4'-tetrahydroxychalcone                                                                                            | x | x | x |
| <b>Isoflavans</b> |                                                                                                                                 |   |   |   |
| 418               | 7,4'-Dihydroxy-2',5'-dimethoxyisoflavan                                                                                         | ✓ | x | x |
| 419               | 7,4'-Dihydroxy-2'-methoxy-3-(3-methylbut-2-enyl)isoflavan (2'-O-Methylphaseollidinisoflavan)                                    | x | ✓ | x |

| <b>Isoflavanones</b> |                                                                                                                   |   |   |   |
|----------------------|-------------------------------------------------------------------------------------------------------------------|---|---|---|
| 420                  | ®-2,3-Dihydro-7-demethylrobustigenin (®-5,7-Dihydroxy-2',4',5'- trimethoxyisoflavanone)                           | ✓ | x | x |
| 421                  | 5,3'-Dihydroxy-4'-methoxy-5'-(3-methyl-1,3-butadienyl)-2'',2''- dimethylpyrano[5,6:6,7] isoflavanone              | x | ✓ | x |
| 422                  | 5,3'-Dihydroxy-5'-(3-hydroxy-3-methyl-1-butenyl)-4'-methoxy-2'',2''- dimethylpyrano[5,6:6,7]isoflavanone          | x | x | x |
| 423                  | Erybruccin A                                                                                                      | ✓ | x | x |
| 424                  | Erybruccin B                                                                                                      | ✓ | ✓ | x |
| 425                  | Erydroogmansin A                                                                                                  | x | ✓ | x |
| 426                  | Erynone                                                                                                           | x | ✓ | x |
| 427                  | Erysenegalensein B                                                                                                | x | x | x |
| 428                  | Erysenegalensein C                                                                                                | x | ✓ | x |
| 429                  | Kenusanone F                                                                                                      | ✓ | x | x |
| 430                  | sophoraisoflavanone A                                                                                             | x | x | x |
| <b>Isoflavones</b>   |                                                                                                                   |   |   |   |
| 431                  | Biochanin A                                                                                                       | x | ✓ | x |
| 432                  | Daidzein7-O-β-D-glucopyranoside                                                                                   | ✓ | ✓ | x |
| 433                  | 5,4'-Dihydroxy-8-(3''-methylbut-2''-enyl)-2'''-(4'''-hydroxy-4'''-methylethyl)- furano-[4''',5''':6,7] isoflavone | ✓ | ✓ | x |
| 434                  | 5,4'-Dihydroxy-2''-hydroxyisopropylidihydrofurano [4,5:7,8]-isoflavone                                            | ✓ | ✓ | x |
| 435                  | 5,4'-Dihydroxy-(3'',4''-dihydro-3''-hydroxy)-2'',2''-dimethylpyrano[5'',6'':6,7]isoflavone (M-Wi-2)               | ✓ | ✓ | x |
| 436                  | 5,4'-Di-O-methylalpinumisoflavone (Dimethylalpinumisoflavone)                                                     | x | ✓ | x |
| 437                  | Erycaffra A                                                                                                       | x | ✓ | x |
| 438                  | Erycaffra B                                                                                                       | x | ✓ | x |
| 439                  | Erycaffra C                                                                                                       | x | ✓ | x |
| 440                  | Erydroogmansin B                                                                                                  | x | ✓ | x |
| 441                  | Erylassitin F                                                                                                     | x | ✓ | x |
| 442                  | Erysacleuxin A                                                                                                    | x | ✓ | x |
| 443                  | Erysacleuxin B                                                                                                    | x | ✓ | x |
| 444                  | Erythraddison A                                                                                                   | x | ✓ | x |
| 445                  | Erythrinin D                                                                                                      | x | ✓ | ✓ |
| 446                  | Erythrinin E                                                                                                      | ✓ | ✓ | ✓ |
| 447                  | Erythrinin F                                                                                                      | ✓ | ✓ | x |
| 448                  | Erythrinin G                                                                                                      | ✓ | ✓ | ✓ |
| 449                  | Erythrinin H                                                                                                      | x | ✓ | x |
| 450                  | Erythrivarone A                                                                                                   | x | ✓ | x |
| 451                  | Erythrivarone B                                                                                                   | x | ✓ | x |
| 452                  | Eryvarin F                                                                                                        | x | ✓ | x |
| 453                  | Eryvarin G                                                                                                        | x | ✓ | x |
| 454                  | Eryvarin X                                                                                                        | x | ✓ | x |
| 455                  | Fleminphilippin B                                                                                                 | x | ✓ | x |
| 456                  | Glycyrrhizoflavone                                                                                                | x | ✓ | x |
| 457                  | Isosenegalensin                                                                                                   | x | ✓ | ✓ |
| 458                  | 3'-isoprenylgenistein                                                                                             | x | ✓ | x |
| 459                  | Luteone                                                                                                           | x | ✓ | x |
| 460                  | 3'-O-Methylprantensein                                                                                            | x | ✓ | x |
| 461                  | Olibergin A                                                                                                       | x | ✓ | x |

|                     |                                               |   |   |   |
|---------------------|-----------------------------------------------|---|---|---|
| 462                 | 4',5,7-Trihydroxy-8-methylisoflavone          | x | ✓ | x |
| 463                 | 4',5,7-Trihydroxy-8-prenylisoflavone          | x | ✓ | x |
| 464                 | Ulexone A                                     | ✓ | ✓ | ✓ |
| 465                 | Semilicoisoflavone B                          | x | ✓ | x |
| 466                 | Vogeliol                                      | x | ✓ | x |
| <b>Pterocarpans</b> |                                               |   |   |   |
| 467                 | 2-(γ, γ-dimethylallyl)-6a-hydroxyphaseollidin | x | ✓ | x |
| 468                 | 3,9-Dihydroxypterocarp-6a-ene                 | ✓ | ✓ | x |
| 469                 | Erythbidin D                                  | ✓ | ✓ | x |
| 470                 | Erythrabissin II                              | x | ✓ | x |
| 471                 | Gangetinin                                    | x |   | x |
| 472                 | 6α-Hydroxyphaseollidin                        | x | ✓ | x |
| 473                 | Schliebenin A                                 | x | ✓ | x |

**Table S2.** Pharmacokinetics properties of selected flavonoids from genus *Erythrina*

|                         | Compounds                                               |        |        |        |        |        |        |        |        |        |
|-------------------------|---------------------------------------------------------|--------|--------|--------|--------|--------|--------|--------|--------|--------|
|                         | 2                                                       | 5      | 8      | 135    | 136    | 150    | 157    | 165    | 201    |        |
| <b>ADMET Parameters</b> |                                                         |        |        |        |        |        |        |        |        |        |
| <b>Absorption</b>       | Water solubility (log mol/L)                            | -3.201 | -4.364 | -4.132 | -5.206 | -5.172 | -5.967 | -5.062 | -4.398 | -4.798 |
|                         | Caco-2 permeability (log Papp in 10 <sup>-6</sup> cm/s) | 0.153  | 1.118  | 1.118  | 1.062  | 1.061  | 0.706  | 1.234  | 1.229  | 1.367  |
|                         | Intestinal Absorption (% Absorbed)                      | 78.997 | 99.803 | 97.916 | 95.53  | 95.078 | 95.831 | 95.971 | 93.939 | 95.606 |
|                         | P-glycoprotein substrate                                | No     |
|                         | p-glycoprotein I inhibitor                              | Yes    | No     | Yes    |
|                         | p-glycoprotein II inhibitor                             | Yes    | Yes    | Yes    | No     | No     | Yes    | No     | No     | Yes    |
| <b>Distribution</b>     | VDss (log L/kg)                                         | 0.138  | 0.625  | 0.085  | 0.515  | 0.481  | 0.181  | 0.124  | -0.094 | 0.323  |
|                         | Fraction unbound                                        | 0.156  | 0.196  | 0.229  | 0.023  | 0.023  | 0      | 0.05   | 0.153  | 0.163  |
|                         | BBB permeability (log BB)                               | -1.134 | 0.308  | -0.776 | 0.27   | 0.286  | -0.236 | -0.048 | -0.517 | 0.046  |
|                         | CNS permeability (log PS)                               | -2.372 | -1.85  | -2.259 | -1.797 | -1.787 | -2.1   | -1.925 | -3.022 | -1.621 |
| <b>Metabolism</b>       | CYP2D6 substrate                                        | No     |
|                         | CYP3A4 substrate                                        | No     | Yes    | Yes    | Yes    | Yes    | Yes    | Yes    | No     | Yes    |
|                         | CYP1A2 inhibitor                                        | Yes    | No     | Yes    |
|                         | CYP2C19 inhibitor                                       | No     | Yes    | Yes    | Yes    | Yes    | Yes    | Yes    | No     | Yes    |
|                         | CYP2C9 inhibitor                                        | Yes    | No     | Yes    |
|                         | CYP2D6 inhibitor                                        | No     |
|                         | CYP3A4 inhibitor                                        | Yes    | Yes    | No     | No     | No     | Yes    | No     | Yes    | Yes    |
| <b>Excretion</b>        | Total clearance (log mL/min/Kg)                         | 0.536  | 0.695  | 0.699  | 0.205  | 0.329  | 0.306  | 0.225  | 0.508  | 0.209  |
|                         | Renal OCT2 substrate                                    | No     | Yes    | Yes    | Yes    | Yes    | No     | No     | No     | No     |
